# Supplementary material
Source: HighWire-hosted journal article supplement (http://www.qdcxjkg.com/highwire/filestream/113627/field_highwire_adjunct_files/2/verbanck_lci_in_adult_cf_fig_os2_r1.pdf)

# Figure OS2

## scenario 1a

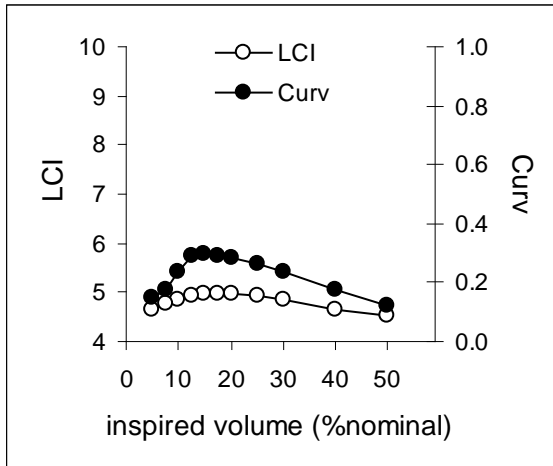

## scenario 1b

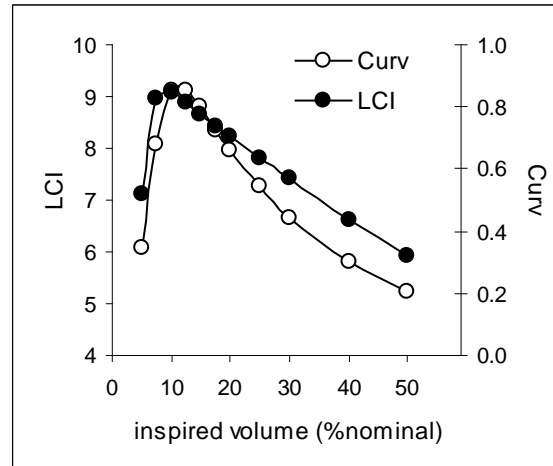

## scenario 2

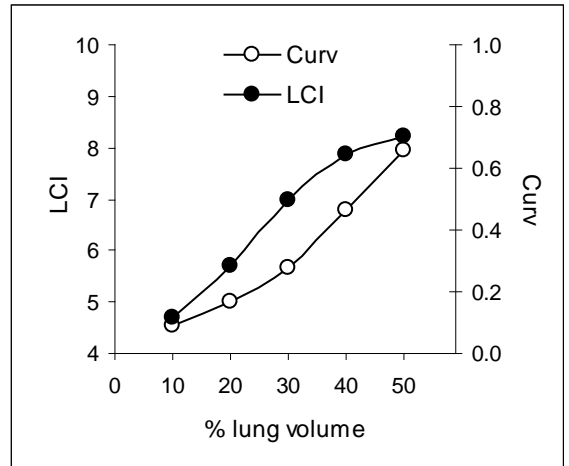

Supplement: verbanck_lci_in_adult_cf_fig_os2_r1.pdf [file verbanck_lci_in_adult_cf_fig_os2_r1.pdf]
